# Supplementary material
Source: MDPI journal article supplement (https://www.mdpi.com/1424-2818/14/7/511)
Supplement: s1 [file s1]

**Table S1.** Allele frequencies in Apennine wolves and dogs. N = allele number.

| Locus   | N  | Allele | Dogs   | Wolves |
|---------|----|--------|--------|--------|
| CPH16   | 1  | 149    | 0.1087 | 0.0000 |
|         | 2  | 151    | 0.0109 | 0.0000 |
|         | 3  | 165    | 0.1304 | 0.0000 |
|         | 4  | 167    | 0.0652 | 0.8708 |
|         | 5  | 169    | 0.2174 | 0.0083 |
|         | 6  | 171    | 0.0326 | 0.1208 |
|         | 7  | 173    | 0.1630 | 0.0000 |
|         | 8  | 175    | 0.0435 | 0.0000 |
|         | 9  | 177    | 0.2283 | 0.0000 |
| C20.253 | 1  | 99     | 0.0778 | 0.9458 |
|         | 2  | 101    | 0.0444 | 0.0458 |
|         | 3  | 103    | 0.1222 | 0.0083 |
|         | 4  | 105    | 0.0222 | 0.0000 |
|         | 5  | 107    | 0.5778 | 0.0000 |
|         | 6  | 109    | 0.1000 | 0.0000 |
|         | 7  | 111    | 0.0444 | 0.0000 |
|         | 8  | 113    | 0.0111 | 0.0000 |
| C20.622 | 1  | 212    | 0.1556 | 0.0000 |
|         | 2  | 218    | 0.4889 | 0.0000 |
|         | 3  | 220    | 0.0778 | 0.0000 |
|         | 4  | 222    | 0.0111 | 0.1667 |
|         | 5  | 224    | 0.0000 | 0.0750 |
|         | 6  | 226    | 0.0000 | 0.0875 |
|         | 7  | 228    | 0.0333 | 0.0000 |
|         | 8  | 232    | 0.0333 | 0.0458 |
|         | 9  | 234    | 0.0000 | 0.5375 |
|         | 10 | 236    | 0.1889 | 0.0875 |
|         | 11 | 240    | 0.0111 | 0.0000 |
| PRK-CD  | 1  | 110    | 0.0233 | 0.0000 |
|         | 2  | 120    | 0.1628 | 0.0000 |
|         | 3  | 122    | 0.0349 | 0.0000 |
|         | 4  | 124    | 0.2791 | 0.5212 |
|         | 5  | 126    | 0.0233 | 0.0254 |
|         | 6  | 134    | 0.3488 | 0.0042 |
|         | 7  | 136    | 0.0930 | 0.0000 |
|         | 8  | 138    | 0.0349 | 0.3559 |
|         | 9  | 142    | 0.0000 | 0.0932 |

|         |    |     |        |        |
|---------|----|-----|--------|--------|
| C09.250 | 1  | 123 | 0.0870 | 0.0000 |
|         | 2  | 127 | 0.0109 | 0.1083 |
|         | 3  | 129 | 0.2065 | 0.2708 |
|         | 4  | 131 | 0.0435 | 0.0000 |
|         | 5  | 133 | 0.3043 | 0.4250 |
|         | 6  | 135 | 0.0870 | 0.0000 |
|         | 7  | 137 | 0.1957 | 0.1833 |
|         | 8  | 139 | 0.0109 | 0.0000 |
|         | 9  | 141 | 0.0435 | 0.0125 |
|         | 10 | 143 | 0.0109 | 0.0000 |
| CPH12   | 1  | 190 | 0.0000 | 0.7333 |
|         | 2  | 192 | 0.1556 | 0.0000 |
|         | 3  | 194 | 0.5000 | 0.1333 |
|         | 4  | 196 | 0.0222 | 0.0000 |
|         | 5  | 202 | 0.0000 | 0.1333 |
|         | 6  | 204 | 0.1889 | 0.0000 |
|         | 7  | 206 | 0.1333 | 0.0000 |
| FH2079  | 1  | 261 | 0.0000 | 0.5042 |
|         | 2  | 265 | 0.0109 | 0.0000 |
|         | 3  | 269 | 0.1848 | 0.0000 |
|         | 4  | 273 | 0.5543 | 0.3208 |
|         | 5  | 277 | 0.1848 | 0.1750 |
|         | 6  | 281 | 0.0109 | 0.0000 |
|         | 7  | 285 | 0.0435 | 0.0000 |
|         | 8  | 289 | 0.0109 | 0.0000 |
| CPH2    | 1  | 91  | 0.0000 | 0.1949 |
|         | 2  | 93  | 0.3804 | 0.0000 |
|         | 3  | 95  | 0.1957 | 0.0000 |
|         | 4  | 97  | 0.0217 | 0.0042 |
|         | 5  | 99  | 0.0109 | 0.0847 |
|         | 6  | 101 | 0.0326 | 0.6949 |
|         | 7  | 103 | 0.0109 | 0.0000 |
|         | 8  | 105 | 0.3478 | 0.0212 |
| CPH22   | 1  | 107 | 0.0000 | 0.3125 |
|         | 2  | 109 | 0.9565 | 0.0000 |
|         | 3  | 111 | 0.0435 | 0.0000 |
|         | 4  | 113 | 0.0000 | 0.6875 |
| FH2088  | 1  | 90  | 0.0000 | 0.3792 |
|         | 2  | 114 | 0.2500 | 0.1542 |
|         | 3  | 118 | 0.0870 | 0.0708 |
|         | 4  | 122 | 0.2391 | 0.3958 |
|         | 5  | 126 | 0.2826 | 0.0000 |
|         | 6  | 130 | 0.1413 | 0.0000 |

|      |    |     |        |        |
|------|----|-----|--------|--------|
| CPH5 | 1  | 110 | 0.0543 | 0.0000 |
|      | 2  | 112 | 0.2391 | 0.2583 |
|      | 3  | 114 | 0.1196 | 0.5583 |
|      | 4  | 116 | 0.5217 | 0.0000 |
|      | 5  | 118 | 0.0435 | 0.0000 |
|      | 6  | 120 | 0.0217 | 0.0000 |
|      | 7  | 126 | 0.0000 | 0.1833 |
| CPH8 | 1  | 195 | 0.0109 | 0.0000 |
|      | 2  | 197 | 0.3043 | 0.1624 |
|      | 3  | 199 | 0.0109 | 0.0000 |
|      | 4  | 201 | 0.0217 | 0.0000 |
|      | 5  | 203 | 0.0000 | 0.1368 |
|      | 6  | 205 | 0.3696 | 0.2350 |
|      | 7  | 207 | 0.0543 | 0.0000 |
|      | 8  | 209 | 0.0870 | 0.4060 |
|      | 9  | 211 | 0.1304 | 0.0598 |
|      | 10 | 213 | 0.0109 | 0.0000 |
| CPH9 | 1  | 140 | 0.4222 | 0.0000 |
|      | 2  | 142 | 0.0000 | 0.1042 |
|      | 3  | 144 | 0.0000 | 0.8958 |
|      | 4  | 148 | 0.4667 | 0.0000 |
|      | 5  | 150 | 0.0667 | 0.0000 |
|      | 6  | 152 | 0.0444 | 0.0000 |
| CPH4 | 1  | 129 | 0.0222 | 0.0000 |
|      | 2  | 137 | 0.0889 | 0.0000 |
|      | 3  | 139 | 0.0333 | 0.7731 |
|      | 4  | 141 | 0.4889 | 0.1261 |
|      | 5  | 143 | 0.2889 | 0.0000 |
|      | 6  | 145 | 0.0556 | 0.0000 |
|      | 7  | 149 | 0.0000 | 0.1008 |
|      | 8  | 151 | 0.0222 | 0.0000 |
| CPH3 | 1  | 162 | 0.0000 | 0.2669 |
|      | 2  | 166 | 0.3333 | 0.1356 |
|      | 3  | 170 | 0.0119 | 0.0000 |
|      | 4  | 172 | 0.0357 | 0.0000 |
|      | 5  | 174 | 0.0952 | 0.0254 |
|      | 6  | 178 | 0.0476 | 0.0000 |
|      | 7  | 180 | 0.2024 | 0.5424 |
|      | 8  | 182 | 0.1190 | 0.0297 |
|      | 9  | 184 | 0.0714 | 0.0000 |
|      | 10 | 186 | 0.0238 | 0.0000 |
|      | 11 | 190 | 0.0119 | 0.0000 |
|      | 12 | 192 | 0.0476 | 0.0000 |

|        |    |     |        |        |
|--------|----|-----|--------|--------|
| CPH6   | 1  | 118 | 0.1778 | 0.4619 |
|        | 2  | 120 | 0.0889 | 0.0000 |
|        | 3  | 122 | 0.0889 | 0.0000 |
|        | 4  | 124 | 0.2444 | 0.0339 |
|        | 5  | 126 | 0.1222 | 0.0000 |
|        | 6  | 128 | 0.2778 | 0.0000 |
|        | 7  | 130 | 0.0000 | 0.1568 |
|        | 8  | 132 | 0.0000 | 0.3475 |
|        |    |     |        |        |
| FH2137 | 1  | 154 | 0.0000 | 0.0088 |
|        | 2  | 158 | 0.0435 | 0.1726 |
|        | 3  | 162 | 0.0870 | 0.0000 |
|        | 4  | 164 | 0.0435 | 0.3142 |
|        | 5  | 166 | 0.1196 | 0.0000 |
|        | 6  | 168 | 0.0109 | 0.1593 |
|        | 7  | 170 | 0.2174 | 0.0000 |
|        | 8  | 172 | 0.0109 | 0.0929 |
|        | 9  | 174 | 0.0544 | 0.0000 |
|        | 10 | 178 | 0.0978 | 0.0265 |
|        | 11 | 180 | 0.0543 | 0.0000 |
|        | 12 | 182 | 0.2065 | 0.2257 |
|        | 13 | 186 | 0.0217 | 0.0000 |
|        | 14 | 188 | 0.0109 | 0.0000 |
|        | 15 | 192 | 0.0217 | 0.0000 |
|        |    |     |        |        |
| FH2004 | 1  | 160 | 0.0109 | 0.0000 |
|        | 2  | 172 | 0.1957 | 0.0678 |
|        | 3  | 176 | 0.2717 | 0.3390 |
|        | 4  | 180 | 0.2065 | 0.0169 |
|        | 5  | 184 | 0.1522 | 0.0000 |
|        | 6  | 214 | 0.0109 | 0.0000 |
|        | 7  | 218 | 0.0217 | 0.0000 |
|        | 8  | 224 | 0.0000 | 0.3898 |
|        | 9  | 226 | 0.0217 | 0.0000 |
|        | 10 | 228 | 0.0000 | 0.0297 |
|        | 11 | 232 | 0.0109 | 0.0000 |
|        | 12 | 236 | 0.0000 | 0.1568 |
|        | 13 | 244 | 0.0326 | 0.0000 |
|        | 14 | 248 | 0.0217 | 0.0000 |
|        | 15 | 252 | 0.0217 | 0.0000 |
|        | 16 | 254 | 0.0217 | 0.0000 |

|         |    |     |        |        |
|---------|----|-----|--------|--------|
| FH2161  | 1  | 229 | 0.0217 | 0.0000 |
|         | 2  | 233 | 0.0326 | 0.0000 |
|         | 3  | 237 | 0.1739 | 0.1923 |
|         | 4  | 241 | 0.2609 | 0.3462 |
|         | 5  | 245 | 0.3152 | 0.0513 |
|         | 6  | 249 | 0.0870 | 0.0171 |
|         | 7  | 253 | 0.0978 | 0.0000 |
|         | 8  | 261 | 0.0000 | 0.0043 |
|         | 9  | 265 | 0.0000 | 0.0684 |
|         | 10 | 267 | 0.0109 | 0.0000 |
|         | 11 | 269 | 0.0000 | 0.2906 |
|         | 12 | 273 | 0.0000 | 0.0171 |
|         | 13 | 277 | 0.0000 | 0.0128 |
| AHT137  | 1  | 130 | 0.1222 | 0.0000 |
|         | 2  | 132 | 0.0889 | 0.0000 |
|         | 3  | 134 | 0.0111 | 0.0000 |
|         | 4  | 136 | 0.2556 | 0.0000 |
|         | 5  | 138 | 0.0333 | 0.0000 |
|         | 6  | 140 | 0.0111 | 0.0000 |
|         | 7  | 142 | 0.0222 | 0.0000 |
|         | 8  | 144 | 0.0778 | 0.0000 |
|         | 9  | 146 | 0.1222 | 0.2521 |
|         | 10 | 148 | 0.0778 | 0.4916 |
|         | 11 | 150 | 0.0889 | 0.1597 |
|         | 12 | 152 | 0.0667 | 0.0798 |
|         | 13 | 154 | 0.0222 | 0.0168 |
| AHTK211 | 1  | 86  | 0.0000 | 0.3632 |
|         | 2  | 88  | 0.3261 | 0.4188 |
|         | 3  | 90  | 0.3261 | 0.1453 |
|         | 4  | 92  | 0.2065 | 0.0726 |
|         | 5  | 94  | 0.0543 | 0.0000 |
|         | 6  | 96  | 0.0870 | 0.0000 |
| AHT111  | 1  | 75  | 0.0324 | 0.0307 |
|         | 2  | 79  | 0.0326 | 0.0439 |
|         | 3  | 81  | 0.1305 | 0.3860 |
|         | 4  | 83  | 0.1087 | 0.3377 |
|         | 5  | 85  | 0.5218 | 0.0000 |
|         | 6  | 87  | 0.0109 | 0.2018 |
|         | 7  | 89  | 0.1522 | 0.0000 |
|         | 8  | 91  | 0.0109 | 0.0000 |
