# Supplementary material
Source: MDPI journal article supplement (https://www.mdpi.com/1424-2818/14/7/511)
Supplement: s1 [file s1 › Figure S1.pdf]

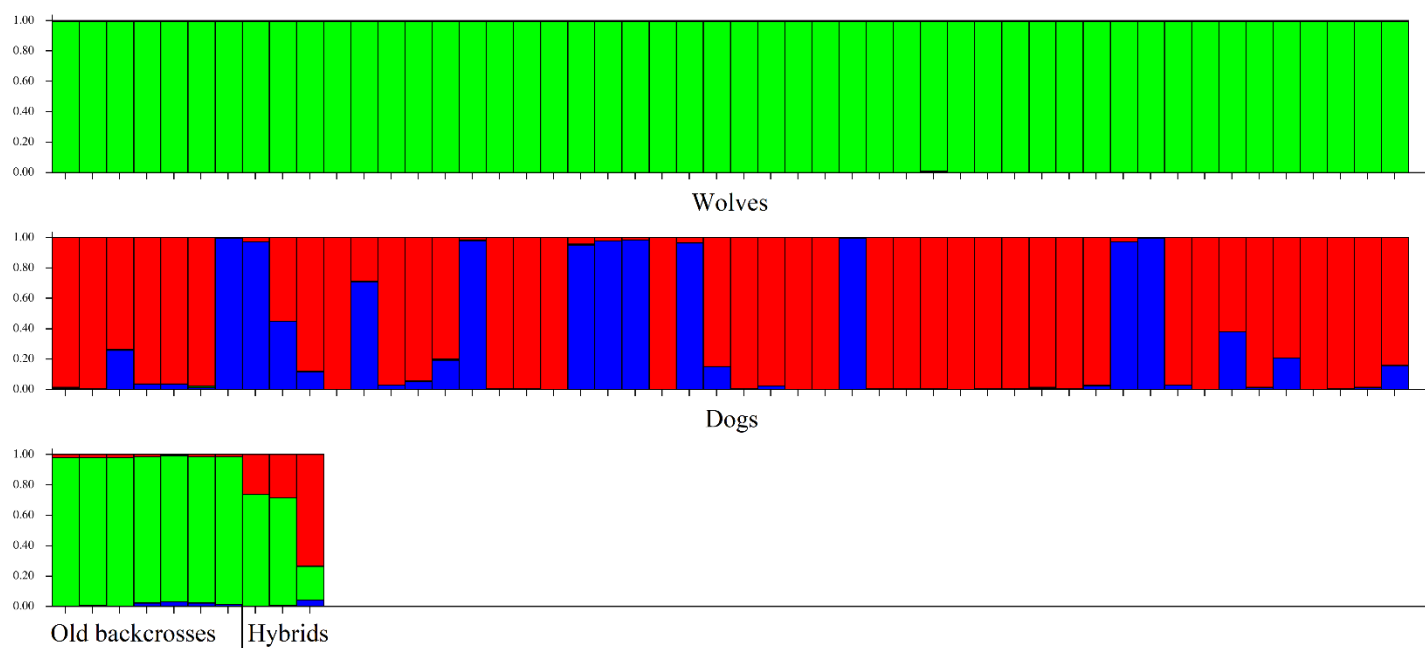

**Figure S1.** Bar plotting of the results from a Bayesian analysis conducted with STRUCTURE. Each vertical bar represents one individual and the length of the different coloured sections is proportional to its membership (q-values) in the three inferred genetic clusters. Wolf component is colored green. Hybrids: recently admixed individuals; old backcrosses: introgressed wolves with minimal domestic ancestry.
